# Supplementary material for: Proposing Two Local Modeling Approaches for Discriminating PGI Sunite Lamb from Other Origins Using Stable Isotopes and Machine Learning
Source: MDPI journal article supplement (doi:10.3390/foods11060846), 2022-03-16
Supplement: s1 [file s1]

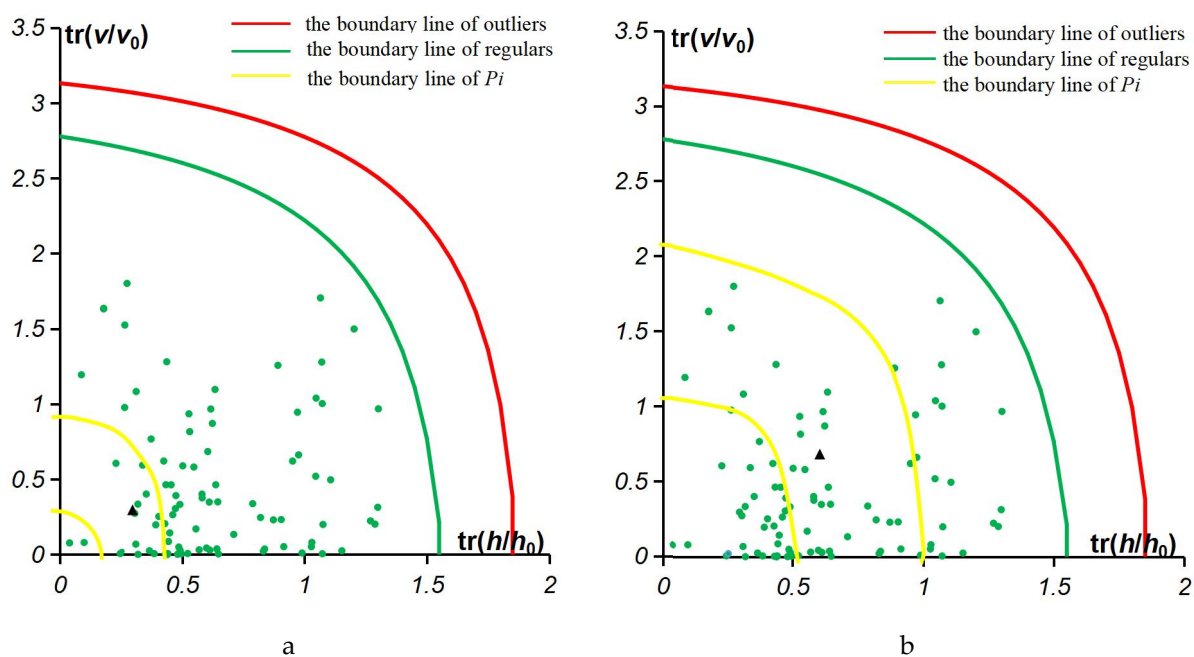

**Figure S1.** Schematic diagram of screening process about the approach of PCA-FD based on DD-SIMCA.

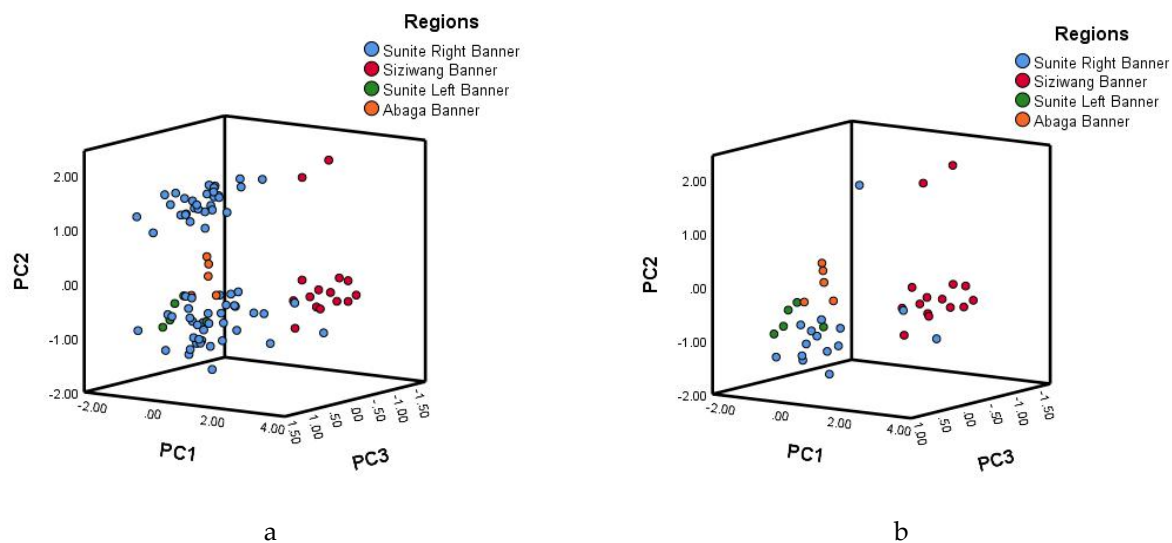

**Figure S2.** 3D-score plot of (a) global lamb isotopes library and (b) local lamb isotopes library according to geographical origin.

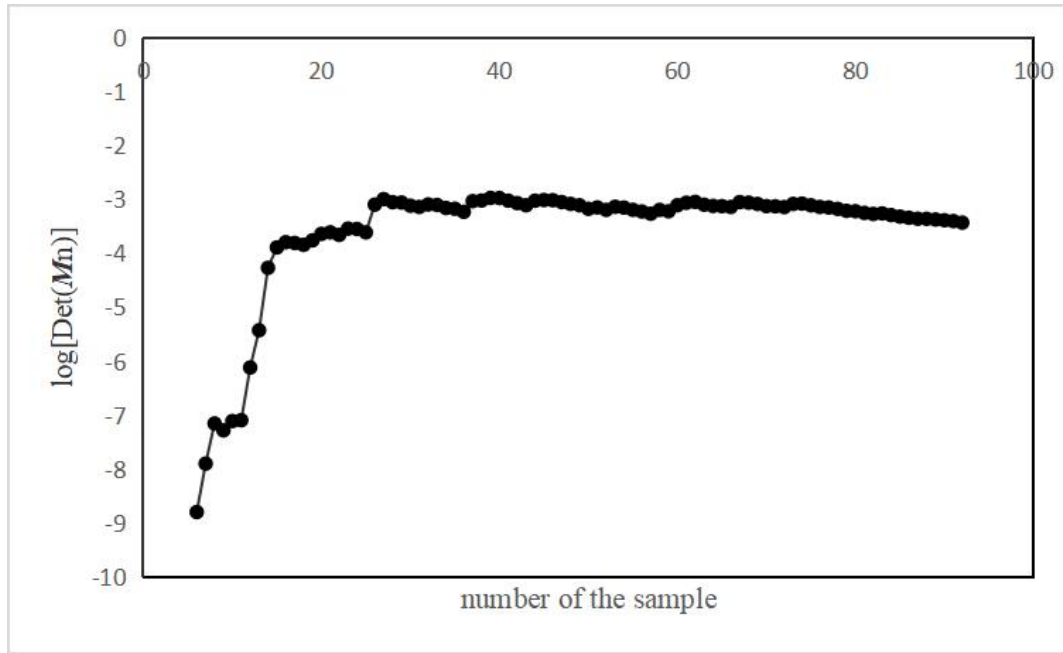

**Figure S3.** Line chart of the relationship between the sample number of training set subset and  $\log[\text{Det}(M_N)]$  value.

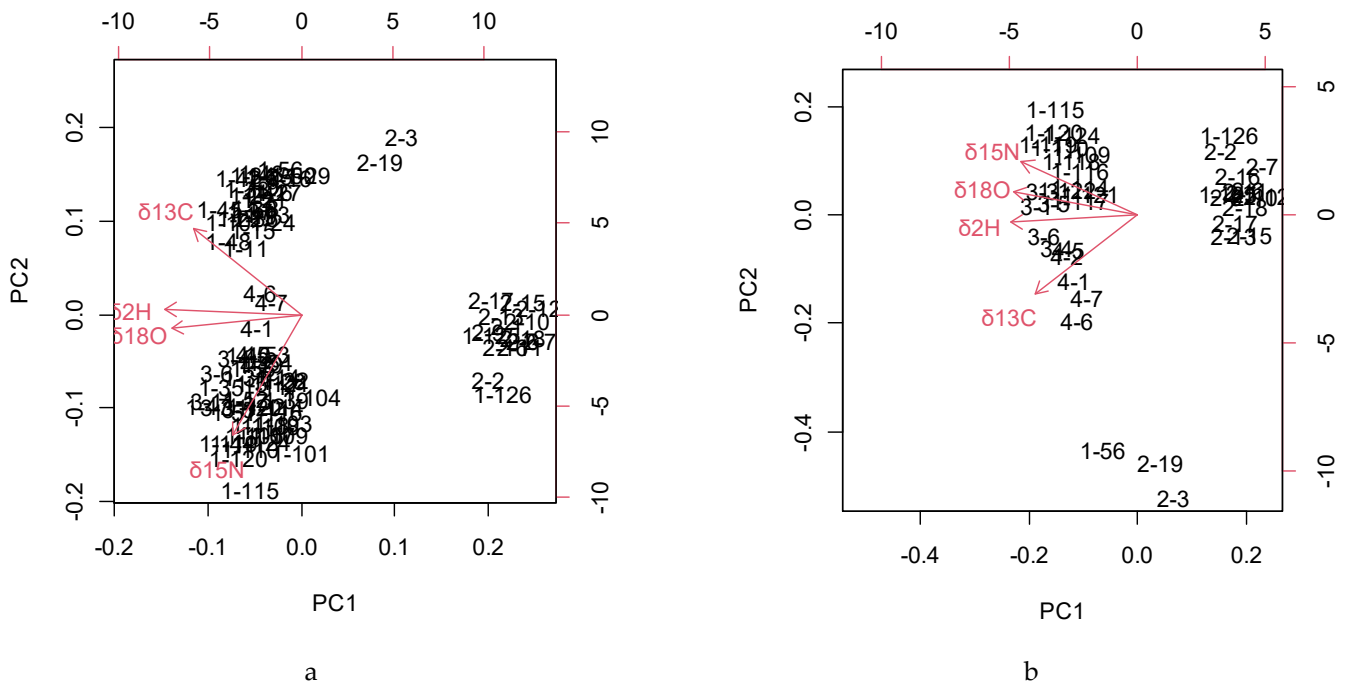

**Figure S4.** Bi-plots of (a) global lamb isotopes library and (b) local lamb isotopes library according to geographical origin.

Note: 1-Sunite Right Banner, 2-Siziwang Banner, 3-Sunite Left Banner, 4-Abaga Banner.

**Table S1.** The region information of lamb samples.

| Groups             | Origin                    | Breed                  | East<br>Longitude | North<br>Latitude | Altitude<br>(m) | Sampling<br>dates | Number |
|--------------------|---------------------------|------------------------|-------------------|-------------------|-----------------|-------------------|--------|
| PGI Sunite<br>lamb | Sunite<br>Right<br>Banner | Sunite<br>sheep        | 112.46            | 43.47             | 1012            | 2020.09           | 84     |
|                    | Sunite Left<br>Banner     | Sunite<br>sheep        | 113.49            | 44.10             | 962             | 2019.07           | 7      |
| Non-PGI<br>lamb    | Siziwang<br>Banner        | Siziwang<br>gobi sheep | 111.30            | 43.23             | 1164            | 2020.11           | 19     |
|                    | Abaga<br>Banner           | Ujimqin<br>sheep       | 114.37            | 44.18             | 1031            | 2019.04           | 6      |

**Table S2.** The  $\delta^{13}\text{C}$ ,  $\delta^{15}\text{N}$ ,  $\delta^2\text{H}$  and  $\delta^{18}\text{O}$  values of all lambs ( $N = 116$ ) from four regions.

| Region              | $\delta^{13}\text{C}$        | $\delta^{15}\text{N}$      | $\delta^2\text{H}$            | $\delta^{18}\text{O}$         |
|---------------------|------------------------------|----------------------------|-------------------------------|-------------------------------|
| Sunite Right Banner | $-19.57 \pm 1.59^{\text{A}}$ | $7.38 \pm 0.95^{\text{B}}$ | $-99.88 \pm 5.99^{\text{AB}}$ | $13.52 \pm 2.04^{\text{Ab}}$  |
| Sunite Left Banner  | $-19.44 \pm 0.25^{\text{A}}$ | $8.13 \pm 0.20^{\text{A}}$ | $-97.12 \pm 1.24^{\text{A}}$  | $15.10 \pm 1.07^{\text{Aa}}$  |
| Siziwang Banner     | $-23.20 \pm 2.09^{\text{C}}$ | $6.23 \pm 0.46^{\text{C}}$ | $-126.85 \pm 4.61^{\text{C}}$ | $6.95 \pm 1.13^{\text{Bab}}$  |
| Abaga Banner        | $-18.95 \pm 0.30^{\text{B}}$ | $7.50 \pm 0.32^{\text{B}}$ | $-101.42 \pm 1.39^{\text{B}}$ | $13.98 \pm 0.75^{\text{Aab}}$ |

Note: The value is given as mean  $\pm$  SD; the small letters represent significant difference ( $p < 0.05$ ), the capital letters represent extremely significant difference ( $p < 0.01$ ) based on ANOVA analysis.
